# Supplementary material for: Comprehensive Analysis of the Transcriptional and Mutational Landscape of Follicular and Papillary Thyroid Cancers
Source: PubMed Central journal article supplement (PMC4975456; doi:10.1371/journal.pgen.1006239), 2016-08-05

**A****DICER1, c.A5438G, p.E1813G**

.T G GCACCA GCAAGC GAC\*CAAAAATAT CCCCAT GGCCTTTG GAA  
 AAGGCCATGGGGGATATTTT\*GAGTCGCTTGCTGGTGCCATTTACA

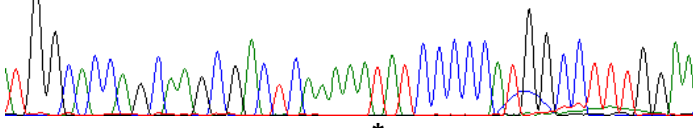

.T G TAAAT G GCACCA GCAAGC GAC\*CAAAAATAT CCCCAT GGCCTT  
 AAGGCCATGGGGGATATTTT\*GAGTCGCTTGCTGGTGCCATTTACAT

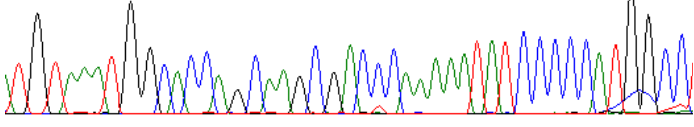**DICER1, c.G5437C, p.E1813Q**

G TAAAT G GCACCA GCAAGC GAC\*CAAAAATAT CCCCAT GGCCTT  
 CAAAGGCATGGGGGATATTTT\*GAGTCGCTTGCTGGTGCCATTTA

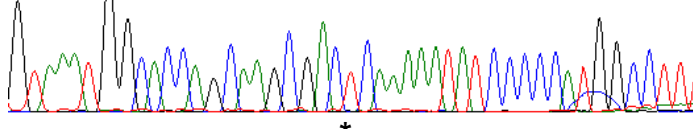

TAAAT G GCACCA GCAAGC GAC\*CAAAAATAT CCCCAT GGCCTT  
 GGCCATGGGGGATATTTT\*GAGTCGCTTGCTGGTGCCATTTACAT

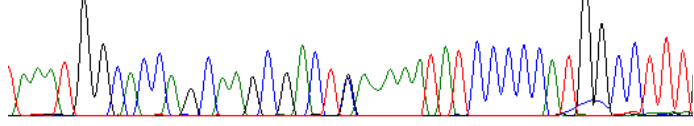**EIF1AX, c.C37T, p.R13C**

CATTCTCATTCCTTACCCCTGC\*GCTGTTTTTACCTCCTTTACCTGA  
 GGTAAGGAGGTAAAAACAG\*GCAGGGGTAAGAATGAGAATGAA

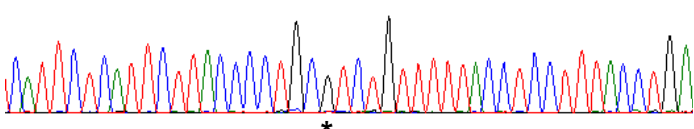

ATTCTCATTCTTACCCCTGC\*GCTGTTTTTACCTCCTTTACCTG  
 ATCAGGTAAAGGAGGTAAAAACAG\*GCAGGGGTAAGAATGAGAA

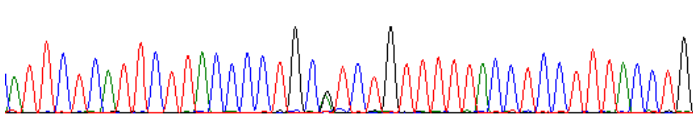**EZH1, c.A1712G, p.Q571R**

CAC TGCCAGATAGCAAGGACAT\*GCTTGGTATTGCAC TGGGCTTT  
 C T TAG ACCAG TG CA TACCAA G CAAT GT CCTT GCTAT CT G GCAI

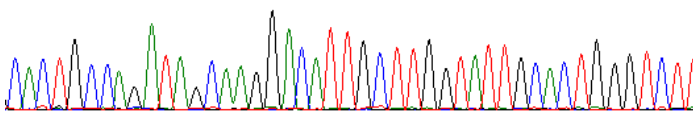

GCAC TGCCAGATAGCAAGGACAT\*GCTTGGTATTGCAC TGGGCTTT  
 TAG AC CAG TG CA TACCAA G C\*GATGT CCT TG C TAT CT G GCAG T GCG,

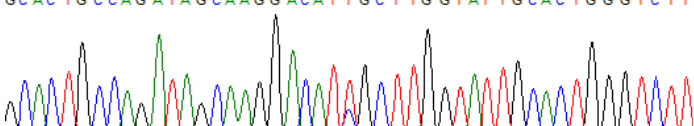**SPOP, c.C281G, p.P94R**

> T TACC N GT TAC N GG TCAGC NG TC\*CAAGAGTGAAGTT C GGGCAAAA  
 G C GA CTT NCTCTTT\*GAAGCTG ACCAG TAACAGG TAAAGT GACAGG

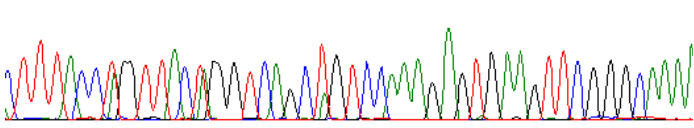

T TACC TG T TAC TG GN CAG CT G TC\*CAAGAGTGAAGTT C GGGCAAAA  
 G CC G A CTT NCTCTTT\*GAAGCTG ACCAG TAACAGG TAAAGT GACA

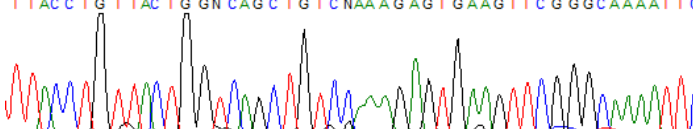**B**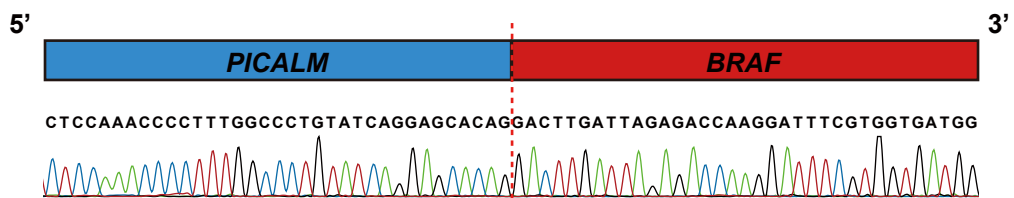

Supplement: pgen.1006239.s002.pdf [file pgen.1006239.s002.pdf]
