# Supplementary material for: Comprehensive Analysis of the Transcriptional and Mutational Landscape of Follicular and Papillary Thyroid Cancers
Source: PubMed Central journal article supplement (PMC4975456; doi:10.1371/journal.pgen.1006239), 2016-08-05

| Category                                   | KEGG pathway                         | BRAF-like                                 | RAS-like                     | DICER1 | EIF1AX | ESRRA-overexpression | PAX8-PPARG |  |  |
|--------------------------------------------|--------------------------------------|-------------------------------------------|------------------------------|--------|--------|----------------------|------------|--|--|
| Metabolism                                 | Global and overview maps             |                                           |                              |        |        |                      |            |  |  |
|                                            | Carbohydrate metabolism              | FATTY ACID METABOLISM                     |                              |        |        |                      |            |  |  |
|                                            |                                      | CITRATE CYCLE TCA CYCLE                   |                              |        |        |                      |            |  |  |
|                                            |                                      | PROPANOATE METABOLISM                     |                              |        |        |                      |            |  |  |
|                                            |                                      | GLYCOLYSIS GLUCONEOGENESIS                |                              |        |        |                      |            |  |  |
|                                            |                                      | PYRUVATE METABOLISM                       |                              |        |        |                      |            |  |  |
|                                            |                                      | GLYOXYLATE AND DICARBOXYLATE METABOLISM   |                              |        |        |                      |            |  |  |
|                                            | BUTANOATE METABOLISM                 |                                           |                              |        |        |                      |            |  |  |
|                                            | Energy metabolism                    | OXIDATIVE PHOSPHORYLATION                 |                              |        |        |                      |            |  |  |
|                                            | Lipid metabolism                     | SPHINGOLIPID METABOLISM                   |                              |        |        |                      |            |  |  |
|                                            | Nucleotide metabolism                | PURINE METABOLISM                         |                              |        |        |                      |            |  |  |
|                                            |                                      | PYRIMIDINE METABOLISM                     |                              |        |        |                      |            |  |  |
|                                            | Amino acid metabolism                | VALINE LEUCINE AND ISOLEUCINE DEGRADATION |                              |        |        |                      |            |  |  |
|                                            |                                      | TRYPTOPHAN METABOLISM                     |                              |        |        |                      |            |  |  |
| ARGININE AND PROLINE METABOLISM            |                                      |                                           |                              |        |        |                      |            |  |  |
| ALANINE ASPARTATE AND GLUTAMATE METABOLISM |                                      |                                           |                              |        |        |                      |            |  |  |
| Metabolism of other amino acids            | GLUTATHIONE METABOLISM               |                                           |                              |        |        |                      |            |  |  |
| Metabolism of cofactors and vitamins       | PORPHYRIN AND CHLOROPHYLL METABOLISM |                                           |                              |        |        |                      |            |  |  |
| Genetic Information Processing             | Transcription                        | RNA POLYMERASE                            |                              |        |        |                      |            |  |  |
|                                            |                                      | SPLICEOSOME                               |                              |        |        |                      |            |  |  |
|                                            | Translation                          | RIBOSOME                                  |                              |        |        |                      |            |  |  |
| AMINOACYL TRNA BIOSYNTHESIS                |                                      |                                           |                              |        |        |                      |            |  |  |
| Folding, sorting and degradation           | PROTEASOME                           |                                           |                              |        |        |                      |            |  |  |
| Environmental Information Processing       | Signal transduction                  | MAPK SIGNALING PATHWAY                    |                              |        |        |                      |            |  |  |
|                                            |                                      | CALCIUM SIGNALING PATHWAY                 |                              |        |        |                      |            |  |  |
|                                            |                                      | WNT SIGNALING PATHWAY                     |                              |        |        |                      |            |  |  |
|                                            | Membrane transport                   | ABC TRANSPORTERS                          |                              |        |        |                      |            |  |  |
|                                            |                                      | PHOSPHATIDYLINOSITOL SIGNALING SYSTEM     |                              |        |        |                      |            |  |  |
|                                            | Signal transduction                  | VEGF SIGNALING PATHWAY                    |                              |        |        |                      |            |  |  |
|                                            |                                      | MTOR SIGNALING PATHWAY                    |                              |        |        |                      |            |  |  |
|                                            | Signaling molecules and interaction  | ECM RECEPTOR INTERACTION                  |                              |        |        |                      |            |  |  |
|                                            |                                      | CELL ADHESION MOLECULES (CAMS)            |                              |        |        |                      |            |  |  |
|                                            |                                      | CYTOKINE CYTOKINE RECEPTOR INTERACTION    |                              |        |        |                      |            |  |  |
| Cellular Processes                         | Transport and catabolism             | LYSOSOME                                  |                              |        |        |                      |            |  |  |
|                                            |                                      | PEROXISOME                                |                              |        |        |                      |            |  |  |
|                                            | Cell motility                        | REGULATION OF ACTIN CYTOSKELETON          |                              |        |        |                      |            |  |  |
|                                            |                                      | CELL CYCLE                                |                              |        |        |                      |            |  |  |
|                                            | Cell growth and death                | P53 SIGNALING PATHWAY                     |                              |        |        |                      |            |  |  |
| Cellular community                         | FOCAL ADHESION                       |                                           |                              |        |        |                      |            |  |  |
|                                            | TIGHT JUNCTION                       |                                           |                              |        |        |                      |            |  |  |
|                                            | GAP JUNCTION                         |                                           |                              |        |        |                      |            |  |  |
| Organismal Systems                         | Immune system                        | COMPLEMENT AND COAGULATION CASCADES       |                              |        |        |                      |            |  |  |
|                                            |                                      | CHEMOKINE SIGNALING PATHWAY               |                              |        |        |                      |            |  |  |
|                                            |                                      | NATURAL KILLER CELL MEDIATED CYTOTOXICITY |                              |        |        |                      |            |  |  |
|                                            | Endocrine system                     | INSULIN SIGNALING PATHWAY                 |                              |        |        |                      |            |  |  |
|                                            |                                      | MELANOGENESIS                             |                              |        |        |                      |            |  |  |
|                                            |                                      | GNRH SIGNALING PATHWAY                    |                              |        |        |                      |            |  |  |
|                                            |                                      | PROGESTERONE MEDIATED OOCYTE MATURATION   |                              |        |        |                      |            |  |  |
|                                            |                                      | PPAR SIGNALING PATHWAY                    |                              |        |        |                      |            |  |  |
|                                            | Circulatory system                   | ADIPOCYTOKINE SIGNALING PATHWAY           |                              |        |        |                      |            |  |  |
|                                            |                                      | CARDIAC MUSCLE CONTRACTION                |                              |        |        |                      |            |  |  |
|                                            | Nervous system                       | VASCULAR SMOOTH MUSCLE CONTRACTION        |                              |        |        |                      |            |  |  |
|                                            |                                      | LONG TERM DEPRESSION                      |                              |        |        |                      |            |  |  |
|                                            | Development                          | LONG TERM POTENTIATION                    |                              |        |        |                      |            |  |  |
| AXON GUIDANCE                              |                                      |                                           |                              |        |        |                      |            |  |  |
| Human Diseases                             | Cancers: Overview                    | PATHWAYS IN CANCER                        |                              |        |        |                      |            |  |  |
|                                            | Cancers: Specific types              | SMALL CELL LUNG CANCER                    |                              |        |        |                      |            |  |  |
|                                            |                                      | MELANOMA                                  |                              |        |        |                      |            |  |  |
|                                            |                                      | CHRONIC MYELOID LEUKEMIA                  |                              |        |        |                      |            |  |  |
|                                            |                                      | GLIOMA                                    |                              |        |        |                      |            |  |  |
|                                            |                                      | PANCREATIC CANCER                         |                              |        |        |                      |            |  |  |
|                                            |                                      | ACUTE MYELOID LEUKEMIA                    |                              |        |        |                      |            |  |  |
|                                            |                                      | PROSTATE CANCER                           |                              |        |        |                      |            |  |  |
|                                            |                                      | BLADDER CANCER                            |                              |        |        |                      |            |  |  |
|                                            |                                      | ENDOMETRIAL CANCER                        |                              |        |        |                      |            |  |  |
|                                            |                                      | RENAL CELL CARCINOMA                      |                              |        |        |                      |            |  |  |
|                                            |                                      | Immune diseases                           | SYSTEMIC LUPUS ERYTHEMATOSUS |        |        |                      |            |  |  |
|                                            |                                      | Neurodegenerative diseases                | ASTHMA                       |        |        |                      |            |  |  |
|                                            |                                      |                                           | PARKINSONS DISEASE           |        |        |                      |            |  |  |
|                                            | ALZHEIMERS DISEASE                   |                                           |                              |        |        |                      |            |  |  |
|                                            | Cardiovascular diseases              | HUNTINGTONS DISEASE                       |                              |        |        |                      |            |  |  |
|                                            |                                      | ARVC                                      |                              |        |        |                      |            |  |  |
|                                            |                                      | VIRAL MYOCARDITIS                         |                              |        |        |                      |            |  |  |
|                                            |                                      | DILATED CARDIOMYOPATHY                    |                              |        |        |                      |            |  |  |
|                                            | Endocrine and metabolic diseases     | HCM                                       |                              |        |        |                      |            |  |  |
|                                            |                                      | TYPE II DIABETES MELLITUS                 |                              |        |        |                      |            |  |  |
|                                            | Infectious diseases: Parasitic       | LEISHMANIA INFECTION                      |                              |        |        |                      |            |  |  |

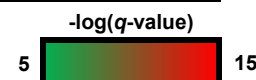

Supplement: pgen.1006239.s005.pdf [file pgen.1006239.s005.pdf]
