# Supplementary material for: Comprehensive Analysis of the Transcriptional and Mutational Landscape of Follicular and Papillary Thyroid Cancers
Source: PubMed Central journal article supplement (PMC4975456; doi:10.1371/journal.pgen.1006239), 2016-08-05

| Category                                  | KEGG pathway                                 | BRAF-like                                    | RAS-like           | DICER1 | EIF1AX | ESRRA-overexpression | PAX8-PPARG |
|-------------------------------------------|----------------------------------------------|----------------------------------------------|--------------------|--------|--------|----------------------|------------|
| Metabolism                                | Lipid metabolism                             | GLYCEROLIPID METABOLISM                      | Green              |        |        |                      |            |
|                                           |                                              | STEROID HORMONE BIOSYNTHESIS                 |                    |        |        |                      |            |
|                                           |                                              | ARACHIDONIC ACID METABOLISM                  |                    | Green  |        |                      |            |
|                                           | Amino acid metabolism                        | TRYPTOPHAN METABOLISM                        | Green              |        |        |                      |            |
|                                           |                                              | ARGININE AND PROLINE METABOLISM              |                    |        |        |                      |            |
| GLYCINE SERINE AND THREONINE METABOLISM   |                                              |                                              |                    |        |        |                      |            |
| Xenobiotics biodegradation and metabolism | METABOLISM OF XENOBIOTICS BY CYTOCHROME P450 |                                              |                    |        | Green  |                      |            |
|                                           | DRUG METABOLISM CYTOCHROME P450              |                                              |                    |        | Green  |                      |            |
| Environmental Information Processing      | Signal transduction                          | MAPK SIGNALING PATHWAY                       | Green              | Green  | Green  | Green                | Green      |
|                                           |                                              | CALCIUM SIGNALING PATHWAY                    | Green              |        |        |                      |            |
|                                           |                                              | WNT SIGNALING PATHWAY                        | Green              |        |        |                      | Green      |
|                                           | Membrane transport                           | ABC TRANSPORTERS                             |                    | Green  |        |                      | Green      |
|                                           |                                              | VEGF SIGNALING PATHWAY                       | Green              |        |        |                      |            |
|                                           | Signaling molecules and interaction          | HEDGEHOG SIGNALING PATHWAY                   | Green              |        |        |                      | Green      |
|                                           |                                              | TGF BETA SIGNALING PATHWAY                   | Green              |        |        |                      |            |
|                                           |                                              | JAK STAT SIGNALING PATHWAY                   | Green              | Green  | Green  | Green                | Green      |
|                                           |                                              | ECM RECEPTOR INTERACTION                     | Green              | Green  | Green  | Green                | Green      |
|                                           |                                              | CELL ADHESION MOLECULES (CAMS)               | Green              | Green  | Green  | Green                | Green      |
| Cellular process                          | Cell motility                                | Green                                        | Green              | Green  | Green  | Green                |            |
|                                           | Cellular community                           | Green                                        | Green              | Green  | Green  | Green                |            |
| Organismal Systems                        | Immune system                                | TIGHT JUNCTION                               | Green              | Green  | Green  | Green                | Green      |
|                                           |                                              | COMPLEMENT AND COAGULATION CASCADES          | Green              | Green  | Green  | Green                | Green      |
|                                           |                                              | CHEMOKINE SIGNALING PATHWAY                  | Green              | Green  | Green  | Green                | Green      |
|                                           |                                              | NATURAL KILLER CELL MEDIATED CYTOTOXICITY    | Green              | Green  | Green  | Green                | Green      |
|                                           |                                              | B CELL RECEPTOR SIGNALING PATHWAY            | Green              | Green  | Green  | Green                | Green      |
|                                           |                                              | T CELL RECEPTOR SIGNALING PATHWAY            | Green              | Green  | Green  | Green                | Green      |
|                                           |                                              | HEMATOPOIETIC CELL LINEAGE                   | Green              | Green  | Green  | Green                | Green      |
|                                           |                                              | LEUKOCYTE TRANSENDOTHELIAL MIGRATION         | Green              | Green  | Green  | Green                | Green      |
|                                           |                                              | FC GAMMA R MEDIATED PHAGOCYTOSIS             | Green              | Green  | Green  | Green                | Green      |
|                                           |                                              | ANTIGEN PROCESSING AND PRESENTATION          | Green              | Green  | Green  | Green                | Green      |
|                                           |                                              | INTESTINAL IMMUNE NETWORK FOR IGA PRODUCTION | Green              | Green  | Green  | Green                | Green      |
|                                           |                                              | NATURAL KILLER CELL MEDIATED CYTOTOXICITY    | Green              | Green  | Green  | Green                | Green      |
|                                           |                                              | TOLL LIKE RECEPTOR SIGNALING PATHWAY         | Green              | Green  | Green  | Green                | Green      |
|                                           | Endocrine system                             | MELANOGENESIS                                | Green              | Green  | Green  | Green                | Green      |
|                                           |                                              | ADIPOCYTOKINE SIGNALING PATHWAY              | Green              | Green  | Green  | Green                | Green      |
|                                           | Circulatory system                           | VASCULAR SMOOTH MUSCLE CONTRACTION           | Green              | Green  | Green  | Green                | Green      |
|                                           | Excretory system                             | ALDOSTERONE REGULATED SODIUM REABSORPTION    | Green              | Green  | Green  | Green                | Green      |
|                                           |                                              | PROXIMAL TUBULE BICARBONATE RECLAMATION      | Green              | Green  | Green  | Green                | Green      |
|                                           | Development                                  | AXON GUIDANCE                                | Green              | Green  | Green  | Green                | Green      |
|                                           | Human Diseases                               | Cancers: Overview                            | PATHWAYS IN CANCER | Green  | Green  | Green                | Green      |
| ACUTE MYELOID LEUKEMIA                    |                                              |                                              | Green              | Green  | Green  | Green                | Green      |
| BASAL CELL CARCINOMA                      |                                              |                                              | Green              | Green  | Green  | Green                | Green      |
| Cancers: Specific types                   |                                              | COLORECTAL CANCER                            | Green              | Green  | Green  | Green                | Green      |
|                                           |                                              | SYSTEMIC LUPUS ERYTHEMATOSUS                 | Green              | Green  | Green  | Green                | Green      |
|                                           |                                              | ASTHMA                                       | Green              | Green  | Green  | Green                | Green      |
| Immune diseases                           |                                              | PRIMARY IMMUNODEFICIENCY                     | Green              | Green  | Green  | Green                | Green      |
|                                           |                                              | ALLOGRAFT REJECTION                          | Green              | Green  | Green  | Green                | Green      |
|                                           |                                              | GRAFT VERSUS HOST DISEASE                    | Green              | Green  | Green  | Green                | Green      |
|                                           |                                              | AUTOIMMUNE THYROID DISEASE                   | Green              | Green  | Green  | Green                | Green      |
|                                           |                                              | VIRAL MYOCARDITIS                            | Green              | Green  | Green  | Green                | Green      |
| Cardiovascular diseases                   |                                              | DILATED CARDIOMYOPATHY                       | Green              | Green  | Green  | Green                | Green      |
|                                           |                                              | HCM                                          | Green              | Green  | Green  | Green                | Green      |
| Endocrine and metabolic diseases          | TYPE I DIABETES MELLITUS                     | Green                                        | Green              | Green  | Green  | Green                |            |
| Infectious diseases: Parasitic            | LEISHMANIA INFECTION                         | Green                                        | Green              | Green  | Green  | Green                |            |

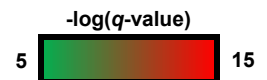

Supplement: pgen.1006239.s006.pdf [file pgen.1006239.s006.pdf]
