# Supplementary material for: Comprehensive Analysis of the Transcriptional and Mutational Landscape of Follicular and Papillary Thyroid Cancers
Source: PubMed Central journal article supplement (PMC4975456; doi:10.1371/journal.pgen.1006239), 2016-08-05

**A** ▲ Current study ● TCGA THCA ■ TCGA Others ☆ COSMIC ● Costa et al ◻ de Kock et al  
 — Missense — Nonsense — Splice

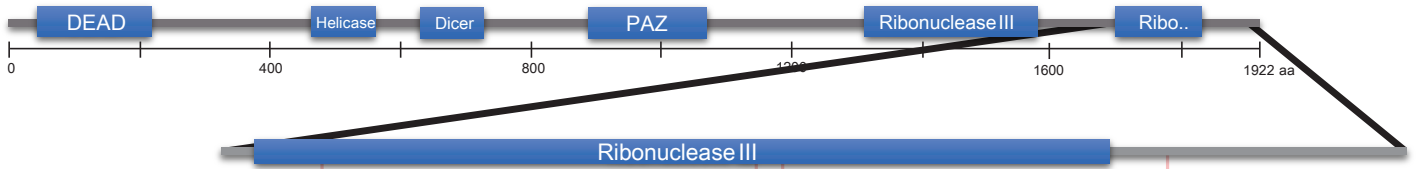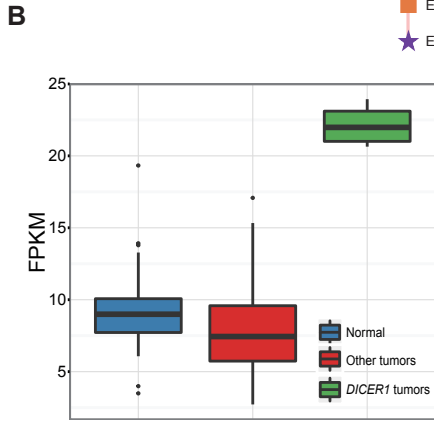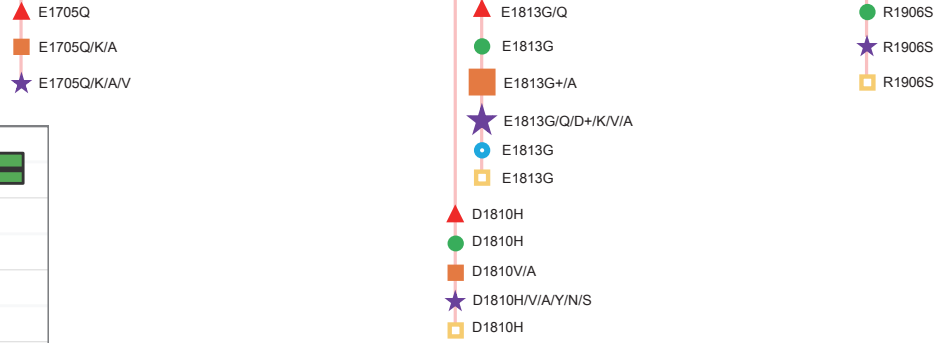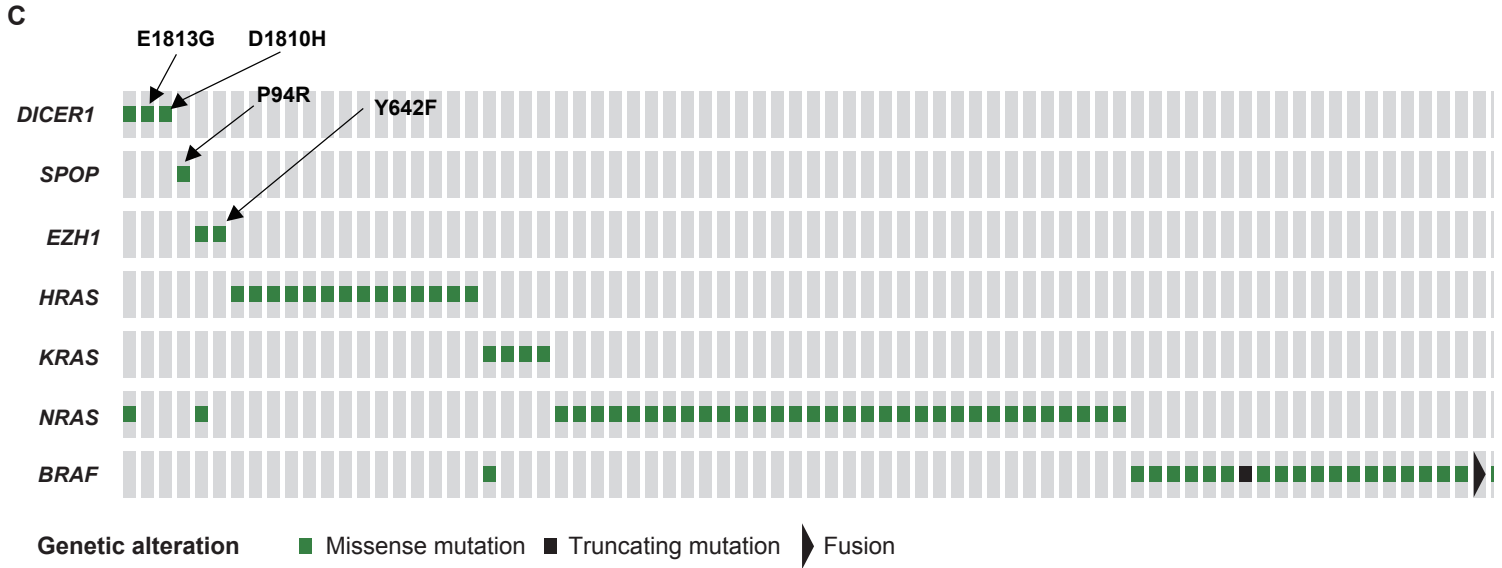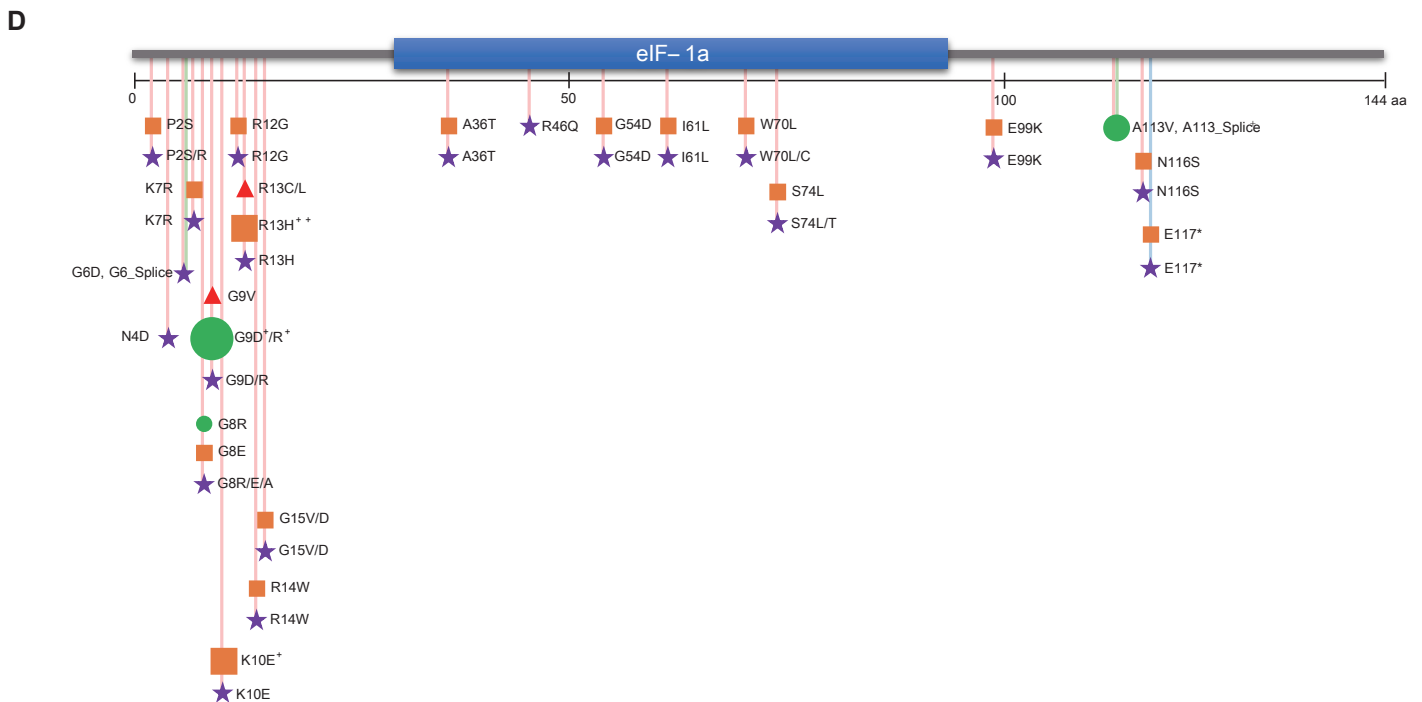

Supplement: pgen.1006239.s001.pdf [file pgen.1006239.s001.pdf]
