# Supplementary material for: Comprehensive Analysis of the Transcriptional and Mutational Landscape of Follicular and Papillary Thyroid Cancers
Source: PubMed Central journal article supplement (PMC4975456; doi:10.1371/journal.pgen.1006239), 2016-08-05

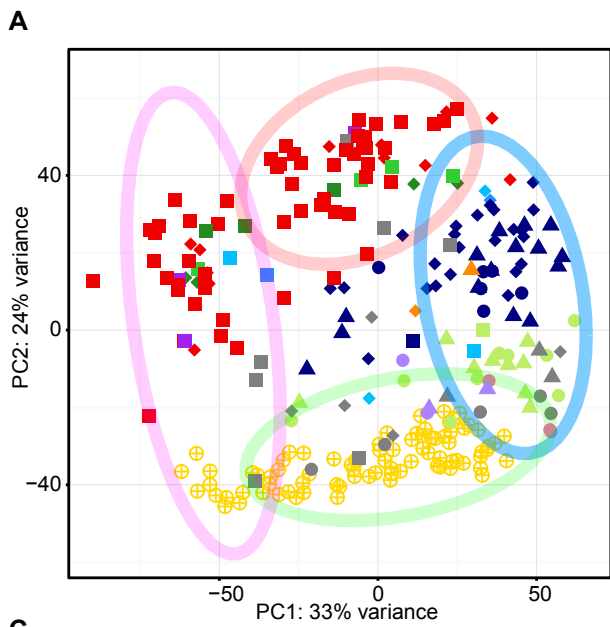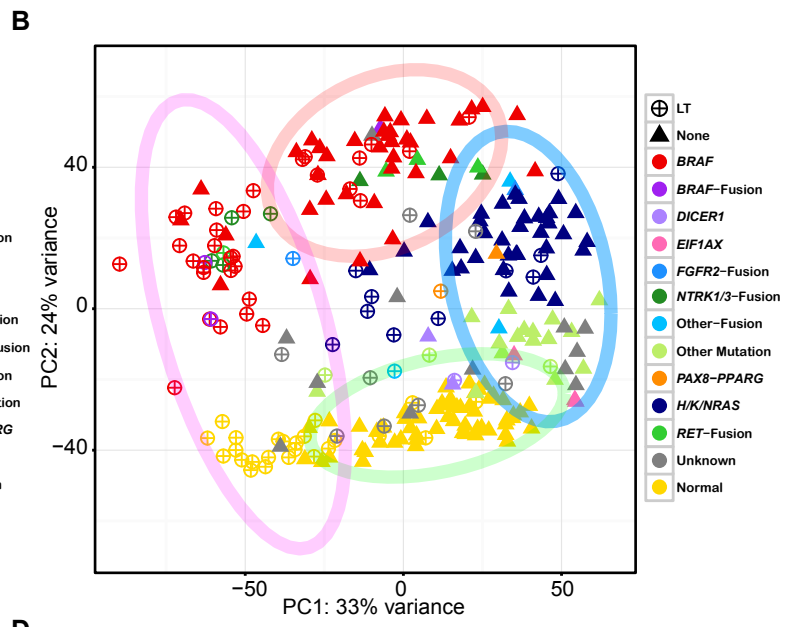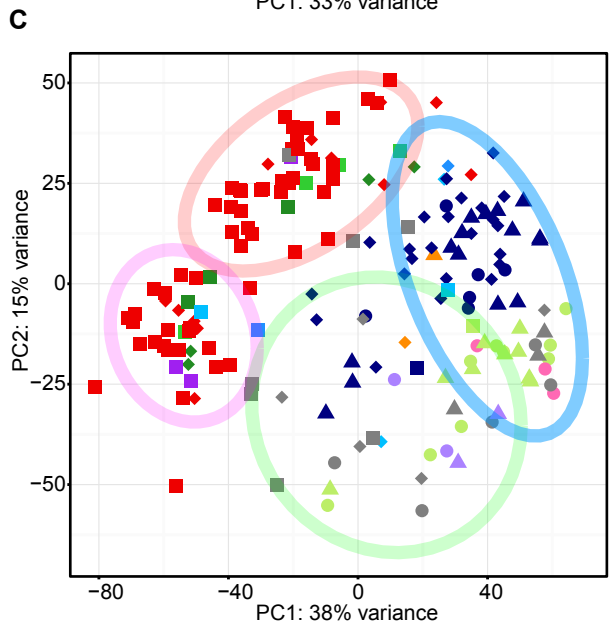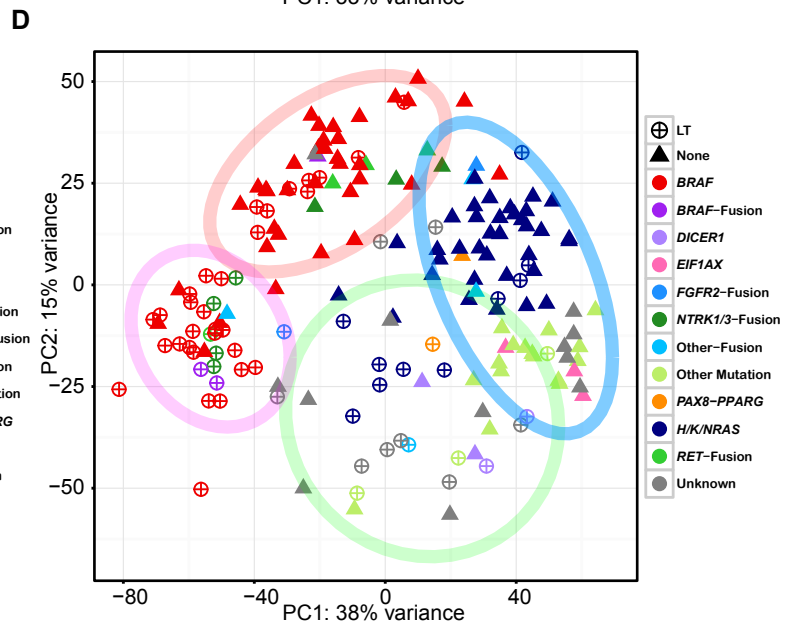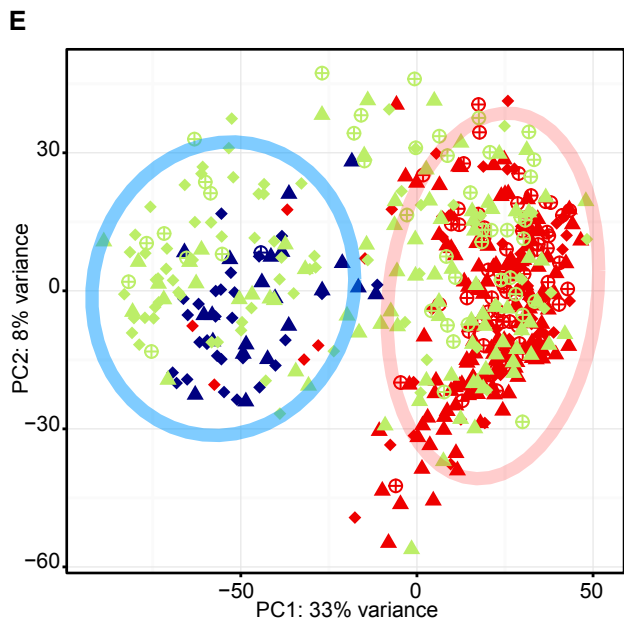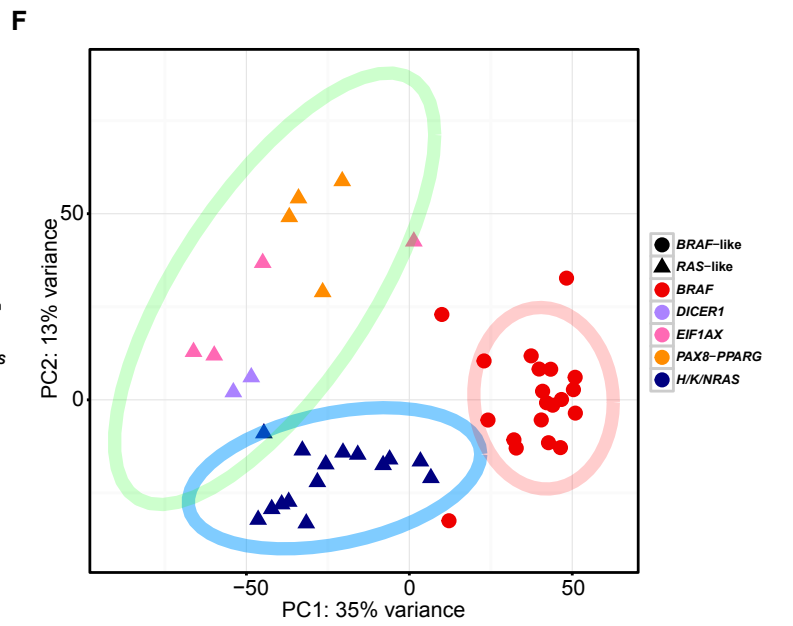

Supplement: pgen.1006239.s004.pdf [file pgen.1006239.s004.pdf]
